# Supplementary material
Source: PubMed Central journal article supplement (PMC3099713)
Supplement: supp_M111.227793_jbc.M111.227793-1.pdf [file supp_M111.227793_jbc.M111.227793-1.pdf]

Fig. S1

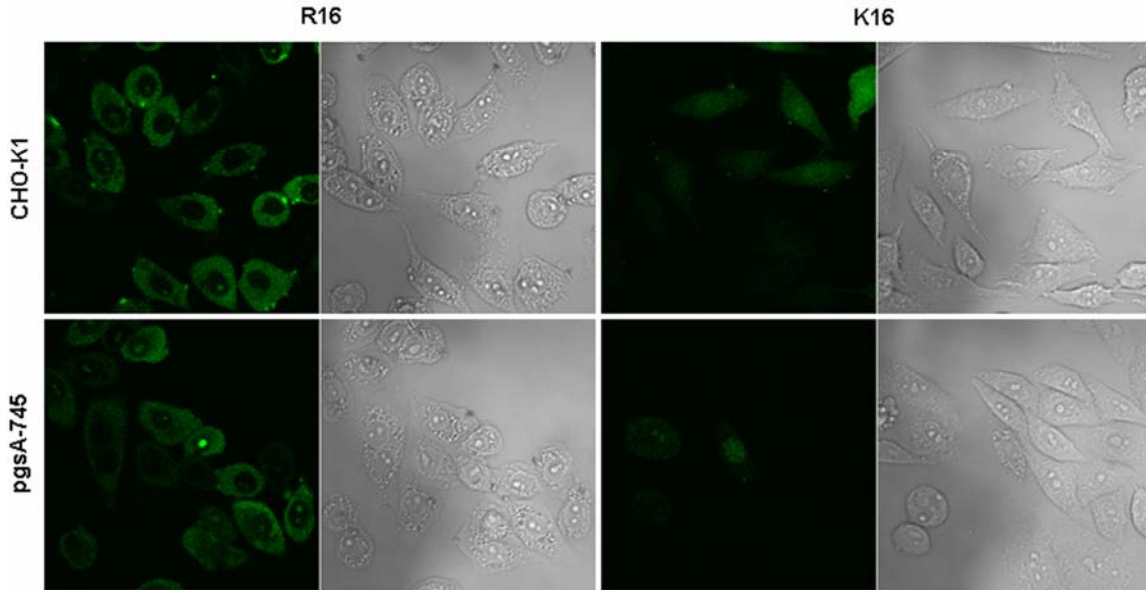

**FIGURE S1. Internalization of R<sub>16</sub> and K<sub>16</sub> peptides in wild-type and GAG-deficient CHO cells**

FITC-labeled R<sub>16</sub> and K<sub>16</sub> peptides (10  $\mu$ M) were added to CHO-K1 and pgsA-745 cells in serum free media. After 1h of incubation at 4°C, cells were washed thrice with ice-cold PBS(+) containing 1mg/ml heparin and imaged using a confocal laser scanning microscope.
